# The Inter-Arm Diastolic Blood Pressure Difference Induced by One Arm Ischemia: A New Approach to Assess Vascular Endothelia Function

Weitong Hu<sup>1,2</sup>, Juxiang Li<sup>1,2</sup>, Hai Su<sup>1\*</sup>, Jiwei Wang<sup>2</sup>, Jinsong Xu<sup>2</sup>, Yanna Liu<sup>2</sup>, Ming Huang<sup>2</sup>, Xiaoshu Cheng<sup>1</sup>

**1** Research Institute of Cardiovascular Diseases and Department of Cardiology, Second Affiliated Hospital of Nanchang University, Nanchang, Jiangxi, People's Republic of China, **2** Clinical Echocardiographic Laboratory, Second Affiliated Hospital of Nanchang University, Nanchang, Jiangxi, People's Republic of China

## Abstract

**Objectives:** To evaluate whether inter-arm diastolic blood pressure difference (DBPI-r) induced by one arm ischemia correlates with flow-mediated dilatation (FMD).

**Methods:** Bilateral arm BPs were simultaneously measured with two automatic devices and right brachial artery diameter (D) was measured by ultrasound technique in 108 subjects (56 hypertensives and 52 normotensives). Following baseline diameter (D0) and BP measurement, right brachial artery was occluded for 5 minutes. The diameter was measured at 1, 1.5 and 2 min, and bilateral BPs measured at 3, 4 and 5 min after occlusion release. Their averages were recorded as post-D and post-BP, respectively. The difference between post-D and D0 ( $\Delta D$ ) was calculated as the percentage increase of artery diameter ( $\Delta D/D0$ ). The BP difference between left and right arms was calculated as BPI-r, and the difference of post-BPI-r and baseline BPI-r was recorded as the net change of BPI-r ( $\Delta BPI-r$ ).

**Results:** At baseline, bilateral SBPs and DBPs were similar. Right arm ischemia induced significant DBP decline only in the right arm ( $68.8 \pm 12.7$  vs  $72.6 \pm 12.0$  mmHg,  $P < 0.05$ ), which led to an increase of  $\Delta DBPI-r$  ( $4.00 \pm 3.75$  vs  $0.78 \pm 4.47$  mmHg,  $P < 0.05$ ). A positive correlation was seen between  $\Delta D/D0$  and  $\Delta DBPI-r$  ( $r = 0.744$ ,  $p < 0.001$ ). Furthermore, the correlation between age and  $\Delta DBPI-r$  ( $r = -0.358$ ,  $P < 0.01$ ) was similar to that between age and  $D/D0$  ( $r = -0.398$ ,  $P < 0.01$ ). Meanwhile, both  $\Delta DBPI-r$  and  $\Delta D/D0$  were significantly lower in hypertensive patients than in normotensive patients.

**Conclusion:** The inter-arm DBP difference induced by one arm ischemia may be a potential index for clinical evaluation of vascular endothelial function.

**Citation:** Hu W, Li J, Su H, Wang J, Xu J, et al. (2014) The Inter-Arm Diastolic Blood Pressure Difference Induced by One Arm Ischemia: A New Approach to Assess Vascular Endothelia Function. PLoS ONE 9(1): e84765. doi:10.1371/journal.pone.0084765

**Editor:** Rajesh Gopalrao Katore, University of Otago, New Zealand

**Received:** July 5, 2013; **Accepted:** November 18, 2013; **Published:** January 13, 2014

**Copyright:** © 2014 Hu et al. This is an open-access article distributed under the terms of the Creative Commons Attribution License, which permits unrestricted use, distribution, and reproduction in any medium, provided the original author and source are credited.

**Funding:** This work was supported by a grant from the National High Technology Research and Development Program of China (863 Program, No. 2012AA02A516). The funders had no role in study design, data collection and analysis, decision to publish, or preparation of the manuscript.

**Competing Interests:** The authors declare no any other potential conflict of interest.

\* E-mail: suyihappy@sohu.com

These authors contributed equally to this work.

## Introduction

Vascular endothelium plays a pivotal role in maintaining normal function of blood vessels because it can synthesize biological active substances that regulate vascular tone [1]. As endothelial dysfunction can result from and/or contribute to several disease processes, including hypertension, hypercholesterolaemia and diabetes, evaluation of vascular endothelial function becomes an important clinical examination.

At present, several noninvasive methods are used to evaluate vascular endothelial function, such as laser Doppler fluximetry for capillaries [2], peripheral artery tonometry for digital arteries [3,4], and flow-mediated dilatation (FMD) method for muscular arteries, like brachial artery. As the most used method, the principle of FMD is to assess the dilatation of brachial artery using

ultrasound technique during post-ischemic reactive hyperemia, when the artery is exposed to increased flow and shear stress[5,6].

Many studies have demonstrated that exercise can lead to reactive hyperemia and post exercise hypotension like short-term ischemia[7–9]. Our previous studies showed that 3-min one-arm exercise induced marked diastolic BP (DBP) decline only in the exercised arm, followed by increase in the inter-arm DBP difference [10]. Furthermore, the inter-arm DBP difference induced by one-arm exercise was age-dependent [11]. However, this action did not induce inter-arm systolic BP difference because the SBP of both arms changed simultaneously during the observation period.

As both acute ischemia and acute exercise can induce reactive hyperemia, we hypothesized that a 5-min ischemia of right arm in FMD test might also cause DBP decline in the ischemic arm and subsequently induces significant DBP difference between the left

and right arms (DBPI-r); meanwhile, the extent of DBPI-r might correlate with the dilatation of brachial artery. If this hypothesis is true, the DBPI-r induced by one arm ischemia may be used to assess the vasodilatation capacity. This study is to test the hypothesis.

## Subjects and Methods

The proposal and the consent procedures of this study were approved by the Ethic Committees of the Second Affiliated Hospital of Nanchang University. After explaining the value of examination, all patients provided verbal informed consent for BP measurement of bilateral arms and FMD test as both of them are non-invasive clinical examination, and as the test results were recorded only in medical record. Then a research assistant nurse took their names and telephone numbers for following up.

From July to September of 2012, 108 subjects (57 males and 51 females, mean age  $51.6 \pm 18.2$  y) were enrolled. Of them, 56 were hypertensive patients (30 under antihypertensive therapy) and 52 were normotensive subjects. The characteristics of two groups with hypertension or normotension are shown in Table 1. All subjects had normal heart arrhythmia.

### Bilateral BP measurement and flow-mediated dilatation test

Examination was performed in an air-conditioned room with a temperature of  $22-23^{\circ}\text{C}$ . Before BP measurement, subjects were asked to empty bladder and take a 10 min rest. The subjects sat with two arms in a comfortable position for imaging right brachial artery and for bilateral BP measurement. Bilateral BPs were simultaneously measured with two automatic BP measurement devices (Omron, HEM-7112). Brachial artery diameter was measured by color Doppler (ALOKA- $\alpha 7$ ) with a probe of 7.5 MHz. The brachial artery was imaged above the antecubital fossa in the longitudinal plane. A segment with clear anterior and posterior intimal interfaces between the lumen and vessel wall was selected for continuous 2D grayscale imaging. In addition, M mode was recorded for measuring diameter [7].

The diameter of right brachial artery at resting state was measured as the baseline value (D0), and then BPs of both arms were simultaneously measured twice with a 2-min interval and their average was taken as the baseline BP (BP0).

After D0 and BP0 taking, a narrow sphygmomanometric cuff was placed above the antecubital fossa of the right arm. Then arterial occlusion was created by cuff inflation to 30 mmHg above systolic BP for 5 minutes, which was then rapidly deflated. For technical reason, brachial artery diameter and arm BP could not be taken simultaneously. So the diameter of right brachial artery was measured at 1 (D1), 1.5 (D1.5) and 2 (D2) min, and bilateral arm BPs were measured at 3 (BP3), 4 (BP4) and 5 (BP5) min after the release of the occlusive cuff, respectively.

### Parameters

**FMD.** The images of individual subjects were analyzed by one investigator. Brachial arterial diameter (D) was measured from the anterior to the posterior interface between the media and adventitia at the onset of R-wave of ECG.

Percentage increase of artery diameter ( $\Delta D/D0$ ): The average of D1, D1.5 and D2 was defined as post-D for assessing the increase of artery diameter  $\Delta D$  ( $\Delta D = \text{post-D} - D0$ ). Then the percentage increase of artery diameter was calculated as ( $\Delta D/D0$ ) (5).

**BP.** Two BP parameters were calculated in this study.

BPb-p was the BP difference before and after ischemia in the right arm (BPb-p = baseline BP - post-ischemia BP). Here the post-ischemia BP was the average of BPb-p3, BPb-p4 and BPb-p5.

$\Delta \text{BPI-r}$  was the difference between post-ischemia BPI-r and baseline BPI-r, which reflects the net change of BPI-r induced by right arm ischemia. Here, the BPI-r was the BP difference between left and right arms ( $\text{BPI-r} = \text{left BP} - \text{right BP}$ ), and the post-ischemia BPI-r was the average of BPI-r3, BPI-r4 and BPI-r5.

The higher baseline BP of two arms was used for individual baseline BP.

### Statistical analysis

Data were processed in Excel 2003 and analyzed with SPSS10.0. Continuous variables were expressed as mean  $\pm$  SD. The t-test and the analysis of variance (ANOVA) were used for the statistical analysis. Lineal regress analysis was performed for the correlation between  $\Delta D/D0$  and BP parameters, as well as the correlations of  $\Delta D/D0$  and  $\Delta \text{BPI-r}$  with age or baseline BP levels. A value of less than 0.05 was considered statistically significant.

## Results

The characteristics of the two subject groups with either hypertension or normotension are shown in Table 1. The SBP and DBP levels, as well as the percentages of diabetes and hyperlipidemia were higher in the hypertensive group, while the age, BMI, gender distribution and incident of heart diseases were similar between the two groups (Table 1).

### Bilateral BP

The SBP and DBP of both arms were similar at baseline and the values of either SBPI-r or DBPI-r were very small. As right arm ischemia only induced significant DBP decline in the right arm, the post-DBPI-r significantly increased following right arm ischemia. However, right arm ischemia did not induce significant change in bilateral SBPs or in post-SBPI-r (Table 2).

### The correlation between $\Delta D/D0$ and BP parameters

We observed a positive correlation between  $\Delta D/D0$  and DBPb-p of right arm ( $r = 0.632$ ,  $P < 0.0001$ ) and between  $\Delta D/D0$  and  $\Delta \text{DBPI-r}$  ( $r = 0.744$ ,  $P < 0.0001$ ) (Figure 1). We did not observe any correlation between  $\Delta D/D0$  and  $\Delta \text{SBPI-r}$ . However, a weak positive correlation was seen between  $D/D0$  and right arm

**Table 1.** The characteristics of two groups with either hypertension or normotension.

|                                | Hypertension<br>(56) | Normotension<br>(52) | P value  |
|--------------------------------|----------------------|----------------------|----------|
| Male (%)                       | 28(50)               | 29(56)               | 0.548    |
| Age (y)                        | $58.9 \pm 13.9$      | $50.7 \pm 18.3$      | 0.078    |
| BMI ( $\text{kg}/\text{m}^2$ ) | $24.2 \pm 7.7$       | $22.9 \pm 8.5$       | 0.549    |
| SBP(mm Hg)                     | $138.7 \pm 19.6$     | $113.9 \pm 12.4$     | $<0.001$ |
| DBP(mm Hg)                     | $74.4 \pm 12.6$      | $63.6 \pm 10.1$      | $<0.001$ |
| Diabetes mellitus (%)          | 13(23.2)             | 4(7.7)               | 0.027    |
| Hyperlipidemia (%)             | 21(37.5)             | 9(17.3)              | 0.019    |
| CHD (%)                        | 2(3.6)               | 3(5.8)               | 0.587    |
| Other heart disease (%)        | 3(5.4)               | 5(9.6)               | 0.399    |

CHD: Coronary heart disease.

doi:10.1371/journal.pone.0084765.t001

**Table 2.** The BP of both arms before and after right arm ischemia (n = 108).

|          | SBP(mmHg)  |            |            | DBP(mmHg) |                         |            |
|----------|------------|------------|------------|-----------|-------------------------|------------|
|          | Left arm   | Right arm  | SBPI-r     | Left arm  | Right arm               | DBPI-r     |
| Baseline | 128.0±21.4 | 129.3±21.7 | -1.34±4.10 | 72.6±11.9 | 72.6±12.0               | -0.03±2.51 |
| Post-    | 125.3±20.7 | 125.9±20.4 | -0.56±4.47 | 72.6±12.1 | 68.8±12.7* <sup>#</sup> | 3.97±3.61* |
| BPb-p    | 2.71±5.93  | 3.49±6.95  | /          | 0.03±2.51 | 3.79±4.49 <sup>#</sup>  | /          |
| ΔBPI-r   | /          | /          | 0.78±4.47  | /         | /                       | 4.00±3.75* |

\*compared with baseline p&lt;0.05;

<sup>#</sup>compared with left arm.

Post-: after right arm ischemia; BPb-p: same-arm BP differences before and after ischemia; ΔBPI-r: BPI-r change following ischemia; (BPI-r: BP difference between left and right arms).

doi:10.1371/journal.pone.0084765.t002

SBPb-p ( $r = 0.261$ ,  $P = 0.006$ ) as well as between D/D0 and left arm SBPb-p ( $r = 0.217$ ,  $P = 0.024$ ).

Like  $\Delta D/D0$ ,  $\Delta DBPI-r$  was negatively correlated with age with similar coefficients (0.398 and 0.358, both  $P < 0.01$ ) (Figure 2).

Notably, the  $\Delta DBPI-r$  was significantly higher in the normotensive group than in the hypertensive group. Similarly, we also observed higher percentage increase in right brachial artery diameter ( $\Delta D/D0$ ) in the normotensive group (Figure 3).

## Discussion

Flow-mediated dilatation (FMD) is a useful method for evaluating vascular endothelial function [12–14]. Usually, the maximal increase in artery diameter occurs within 60 to 120 seconds following release of the occlusive cuff [1]. Therefore, in this study the diameter was measured 60, 90 and 120 seconds after cuff release, the average of which was used to calculate  $\Delta D/D0$  and to evaluate the dilatation capability of brachial artery.

In the current study, we first demonstrated that 5 min ischemia of right arm induced DBP decline in the right arm, leading to the increase in the DBP difference between baseline and post-ischemia (DBPb-p). At the same time, the post-ischemia inter-arm DBP

difference (DBPI-r) increased as well. Because DBPI-r is dependent on the DBP change of both arms, it is a better index than DBPb-p for evaluating vascular endothelial function as the impact of random environmental factors during the observation period is eliminated. Because  $\Delta DBPI-r$  is calculated as the difference of post-ischemic DBPI-r and baseline DBPI-r, it could reflect the net change of DBPI-r induced by right arm ischemia. Therefore, we focused on  $\Delta DBPI-r$  rather than DBPI-r in this study.

Secondly, the present study demonstrated that the DBPb-p was positively correlated with the percentage increase in artery diameter ( $\Delta D/D0$ ) in the right arm. This finding demonstrated that ischemia-induced vascular dilatation is the underlying mechanism for the DBP decline in ischemic right arm. Furthermore, a stronger correlation was found between  $\Delta DBPI-r$  and  $\Delta D/D0$ . This result further indicates that  $\Delta DBPI-r$  is more suitable for evaluating the vascular endothelial function compared with DBPb-p.

Thirdly, the present study revealed that the negative coefficient between  $\Delta DBPI-r$  and age was similar to that between  $\Delta D/D0$  and age. Moreover, both DBPI-r and  $\Delta D/D0$  were significantly lower in the hypertensive group than in the normotensive group. As age and hypertension are two important risk factors for vascular

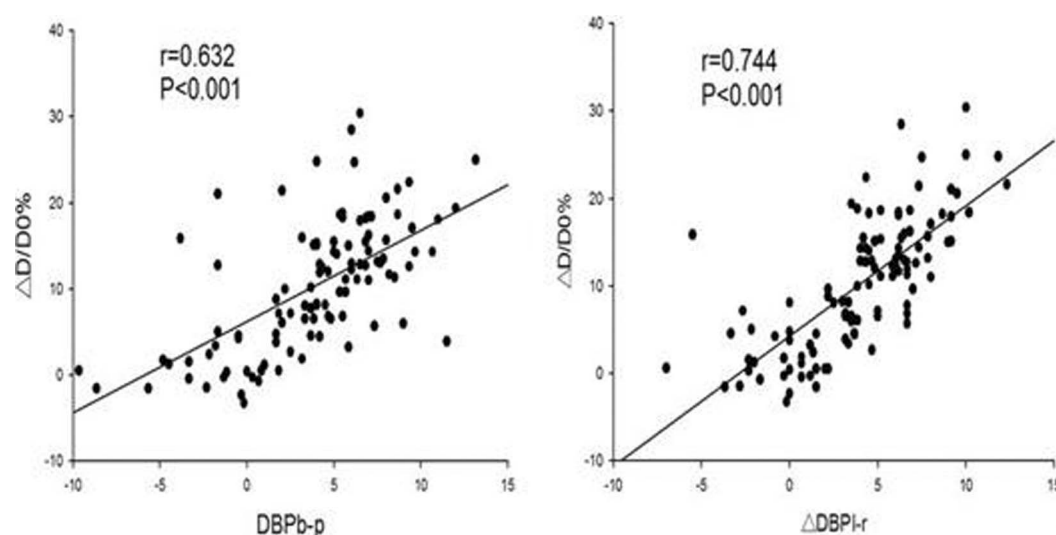

**Figure 1.** The correlation of  $\Delta D/D0$  with DBPb-p and  $\Delta DBPI-r$ .  $\Delta D$ : increase in artery diameter ( $\Delta D = \text{post-D} - D0$ ).  $\Delta D/D0$ : percentage increase in right brachial artery diameter. DBPb-p: DBP change following right-arm ischemia.  $\Delta DBPI-r$ : DBPI-r change following ischemia. (BPI-r: BP difference between left and right arms).

doi:10.1371/journal.pone.0084765.g001

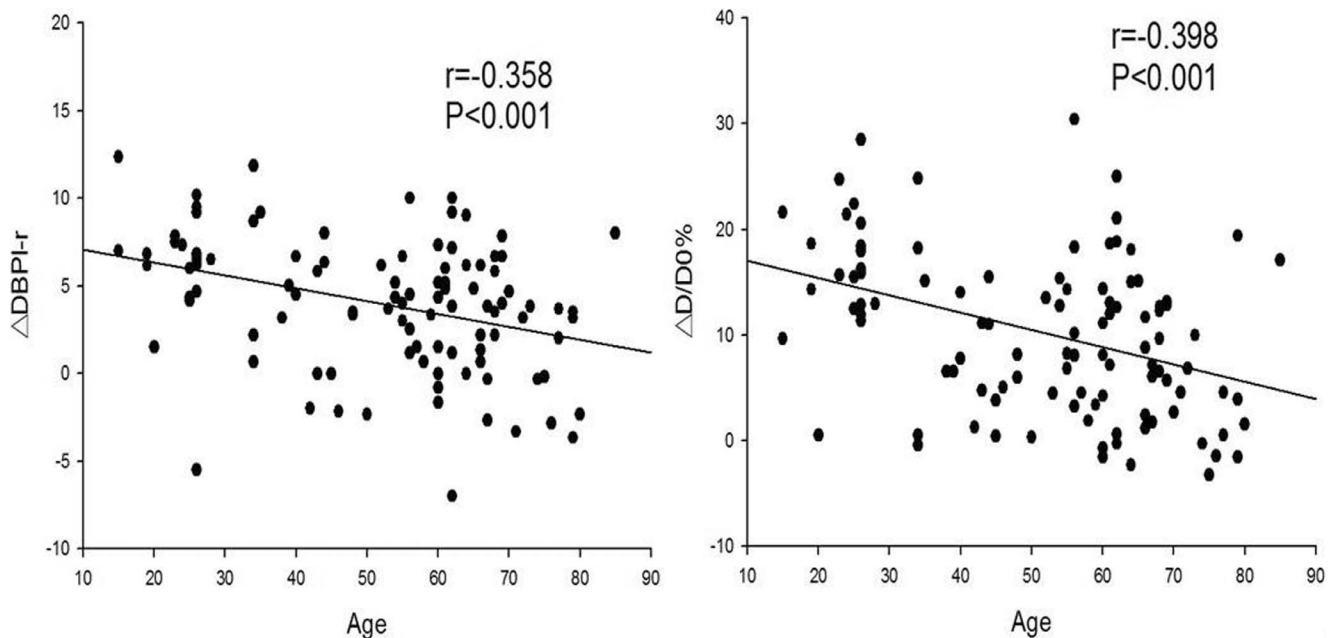

**Figure 2. The correlation of age with  $\Delta$ DBPI-r and  $\Delta$ D/D0.**  $\Delta$ D/D0: percentage increase in right brachial artery diameter.  $\Delta$ DBPI-r: DBPI-r change following ischemia. (DBPI-r: The DBP difference between left and right arms).  
doi:10.1371/journal.pone.0084765.g002

endothelial dysfunction [1], these results suggest that  $\Delta$ DBPI-r has similar power to assess vascular endothelial function as  $\Delta$ D/D0.

Like one arm exercise, one arm ischemia did not induce inter-arm SBP difference, because this procedure induces synchrony SBP change in both arms. However, why one arm exercise or one arm ischemia induces inter-arm diastolic BP difference but not inter-arm systolic BP difference remains unclear. To interpret this phenomenon, we measured the bilateral brachial artery internal diameter (ID), peak systolic flow velocity (PSV) and end diastolic flow velocity (EDV) in 20 young males using Doppler technology before and 5 min after the right-arm ischemia. At baseline, the

SBP, DBP, ID, PSV and EDV were similar between two arms. Right arm ischemia only induced slight dilatation of right brachial artery. However, right arm ischemia induced bilateral PSV increase, while the PSV of the right arm was significantly higher than that of the left arm. These results indicate that right arm had larger systolic blood flow volume, which counteracted the vascular resistance decline to maintain the SBP at the similar level of the left arm. As the end diastolic flow velocity of the right brachial artery was similar to that of the left arm, and there was no additional increase in blood flow volume to counteract the lower vascular resistance, the DBP of right arm was lower than that of left arm. However, this finding is only preliminary, and more research is needed to fully understand the mechanism underlying the different changes between SBP and DBP following one arm ischemia.

Although in this study we observed a decrease of about 3 mmHg in the bilateral SBP throughout the experiment, which resulted in a weakly positive correlation between SBPb-p and  $\Delta$ D/D0 in both arms, we considered this correlation a pseudomorph from SBP decline during the observation period. Although a 10-min rest was taken before BP measurement in our study, this duration may not be enough for a real resting BP. Similar result was reported by Sala et al., in which they found a significant decrease in SBP by 11.6 mm Hg during a 16-min rest on chairs for 55 untreated essential hypertensive patients [15].

### The clinical implication

Compared with FMD, one arm ischemia-induced DBP difference is a simpler and cheaper index as there is no need for special equipment, which may become a way for clinical evaluation of endothelial function, at least as a preliminary screening method.

For technical reason, bilateral arm BPs were measured at 3, 4 and 5 min, but not within 1–2 min after release of occlusive cuff, during which the maximal artery dilatation occurs. It is very possible the correlation between  $\Delta$ DBPI-r and  $\Delta$ D/D0 may be

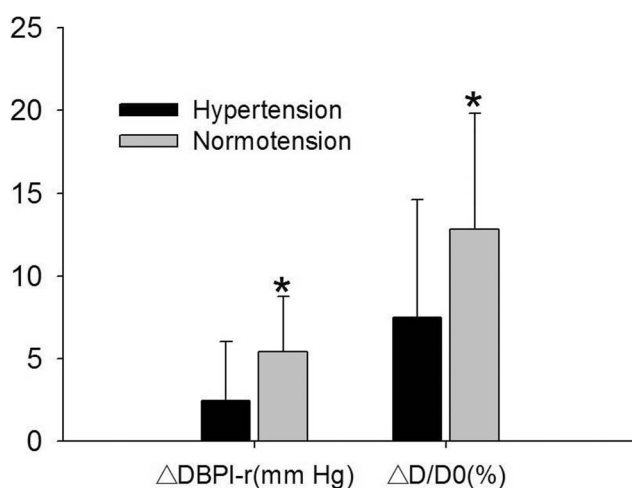

**Figure 3. Comparison of  $\Delta$ D/D0 and  $\Delta$ DBPI-r between groups with hypertension or normotension.** \*  $P < 0.001$  compared with hypertension group.  $\Delta$ D/D0: percentage increase in right brachial artery diameter.  $\Delta$ DBPI-r: DBPI-r change following ischemia. (DBPI-r: DBP difference between left and right arms).  
doi:10.1371/journal.pone.0084765.g003

higher than that reported in this study if  $\Delta\text{DBPI-r}$  is determined within the 1–2 min duration after release of occlusive cuff.

### Limitation

Because of technical difficulty, the brachial artery diameter and BP could not be simultaneously measured. As many factors can influence vascular endothelial function, for example, diet, time and exercise, repeated test must be performed to measure BP and artery diameter at the same time points after release of occlusive cuff. After careful consideration of the possible impact of different dates and two ischemia procedures in a short period, we used a sequential measurement in this study.

However, simultaneous measurement of BP and artery diameter after release of occlusive cuff may be worthy of future studies.

### References

1. Deanfield J, Donald A, Ferri C, Giannattasio C, Halcox J, et al. (2005) Working Group on Endothelin and Endothelial Factors of the European Society of Hypertension. Endothelial function and dysfunction. Part I, Methodological issues for assessment in the different vascular beds, a statement by the Working Group on Endothelin and Endothelial Factors of the European Society of Hypertension. *J Hypertens* 23:7–17.
2. Al-Tahami BA, Bee YT, Ismail AA, Rasool AH (2011) Impaired microvascular endothelial function in relatively young obese humans is associated with altered metabolic and inflammatory markers. *Clin Hemorheol Microcirc* 47:87–97.
3. Bonetti PO, Pumper GM, Higano ST, Holmes DR Jr, Kuvin JT (2004) Non-invasive identification of patients with early coronary atherosclerosis by assessment of digital reactive hyperemia. *JACC* 44:2137–2141.
4. Faizi AK, Kormmo DW, Agewall S (2009) Evaluation of endothelial function using finger plethysmography. *Clin Physiol Funct Imaging* 29:372–375.
5. Corretti MC, Anderson TJ, Benjamin EJ, Celermajer D, Charbonneau F, et al. (2002) International Brachial Artery Reactivity Task Force. Guidelines for the ultrasound assessment of endothelial-dependent flow-mediated vasodilatation of the brachial artery: a report of the International Brachial Artery Reactivity Task Force. *J Am Coll Cardiol* 39:257–65.
6. Zhang X, Zhang R, Raab S, Zheng W, Wang J, et al. (2011) Rhesus macaques develop metabolic syndrome with reversible vascular dysfunction responsive to pioglitazone. *Circulation* 124:77–86.
7. Gaenzer H, Neumayr G, Marschang P, Sturm W, Kirchmair R, et al. (2001) Flow-mediated vasodilatation of the femoral and brachial artery induced by exercise in healthy nonsmoking and smoking men. *JACC* 38: 1313–1319.
8. MacDonald JR (2002) Potential causes, mechanisms, and implications of post exercise hypotension. *J Hum Hypertens* 16:225–236.
9. Faria Tde O, Targueta GP, Angeli JK, Almeida EA, Stefanon I, et al. (2010) Acute resistance exercise reduces blood pressure and vascular reactivity, and increases endothelium-dependent relaxation in spontaneously hypertensive rats. *Eur J Appl Physiol* 110:359–366.
10. Hong D, Wang J, Su H, Xu J, Liu Y, et al. (2011) One arm exercise induces significant inter-arm diastolic blood pressure difference. *Blood Press Monit* 16:134–137.
11. Hu WT, Li JX, Wang JW, Xu JS, Yang Q, et al. (2013) Aging attenuates the inter-arm diastolic blood pressure difference induced by one arm exercise. *Blood Press Monit* 18:107–10.
12. Black MA, Cable NT, Thijssen DH, Green DJ (2009) Impact of age, sex, and exercise on brachial artery flow-mediated dilatation. *Am J Physiol Heart Circ Physiol* 297:H1109–1116.
13. Devan AE, Umpierre D, Harrison ML, Lin HF, Tarumi T, et al. (2011) Endothelial ischemia-reperfusion injury in humans, association with age and habitual exercise. *Am J Physiol Heart Circ Physiol* 300:H813–9.
14. Varady KA, Bhutani S, Klempel MC, Phillips SA (2011) Improvements in vascular health by a low-fat diet, but not a high-fat diet, are mediated by changes in adipocyte biology. *Nutr J* 10:8. doi: 10.1186/1475-2891-10-8.
15. Sala C, Santin E, Rescaldani M, Magrini F (2006) How Long Shall the Patient Rest Before Clinic Blood Pressure Measurement? *American Journal of Hypertension* 19: 713–717.

### Conclusion

As a positive correlation exists between flow-mediated dilatation of brachial artery and inter-arm DBP difference after one arm ischemia, the post-ischemia inter-arm DBP difference may be a potential index for clinical evaluation of vascular endothelial function.

### Author Contributions

Conceived and designed the experiments: HS. Performed the experiments: WTH JWW JSX YNL MH. Analyzed the data: JXL. Wrote the paper: HS XSC.
